# Supplementary material for: Mechanisms of PDGF siRNA-mediated inhibition of bone cancer pain in the spinal cord
Source: PubMed Central journal article supplement (PMC4901320; doi:10.1038/srep27512), 2016-06-10
Supplement: srep27512-s1.pdf [file srep27512-s1.pdf]

# **Mechanisms of PDGF siRNA-mediated inhibition of bone cancer pain in the spinal cord**

Yang Xu<sup>1\*</sup>, Jia Liu<sup>2\*</sup>, Mu He<sup>3</sup>, Ran Liu<sup>1</sup>, Visar Belegu<sup>4</sup>, Ping Dai<sup>3</sup>, Wei Liu<sup>1</sup>, Wei Wang<sup>1</sup>, Qing-Jie Xia<sup>1</sup>, Fei-Fei Shang<sup>1</sup>, Chao-Zhi Luo<sup>1</sup>, Xue Zhou<sup>5</sup>, Su Liu<sup>4</sup>, JohnW.McDonald<sup>4</sup>, Jin Liu<sup>1</sup>, Yun-Xia Zuo<sup>1</sup>, Fei Liu<sup>1#</sup> & Ting-Hua Wang<sup>1,2#</sup>

<sup>1</sup> Institute of Neurological Disease, Department of Anesthesiology and Translation Neuroscience Center, West China Hospital, Sichuan University, Chengdu 610041, PR China, <sup>2</sup> Institute of Neuroscience, Kunming Medical University, Kunming 650031, PR China, <sup>3</sup> Department of Neurosurgery, West China Hospital, Sichuan University, Chengdu 610041, PR China, <sup>4</sup>Department of Neurology, Johns Hopkins School of Medicine, Baltimore, MD, USA, International Center for Spinal Cord Injury, Hugo W. Moser Research Institute at Kennedy Krieger Inc., Baltimore, MD, USA, <sup>5</sup>Department of Histology, Embryology and Neurobiology, West China School of Preclinical and Forensic Medicine, Sichuan University, Chengdu, Sichuan 610041, China.

\*, # These authors contributed equally to this work.

Correspondence to Ting-Hua Wang [tinghua\_neuron@263.net]

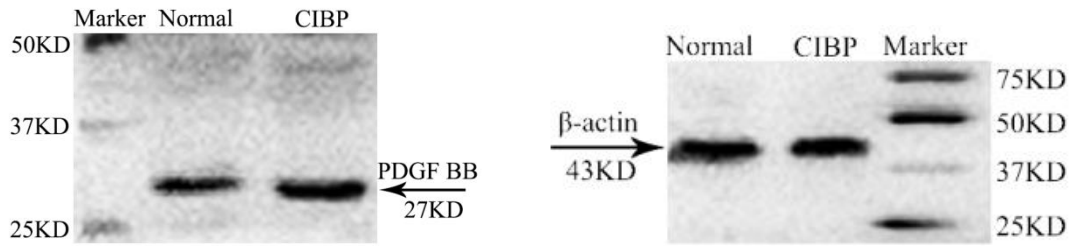

Full-length blots in Figure 1D

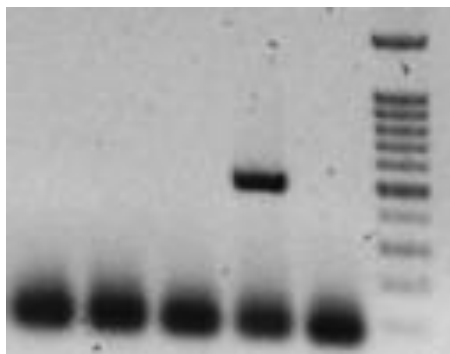

Full-length gels of detected the HSV-1-based virus using RT-PCR analysis in Figure 3C.

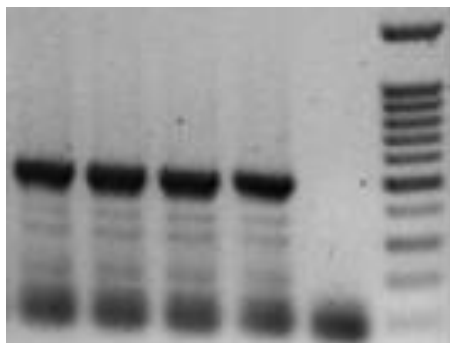

Full-length gels of detected of the HSV-1-based recombination using RT-PCR analysis in Figure 3B.

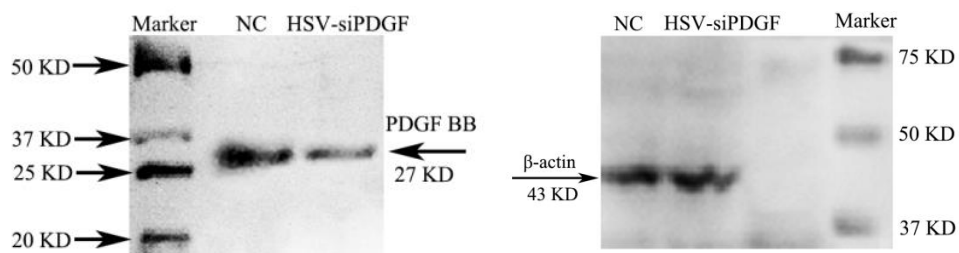

Full-length blots in Figure 4A

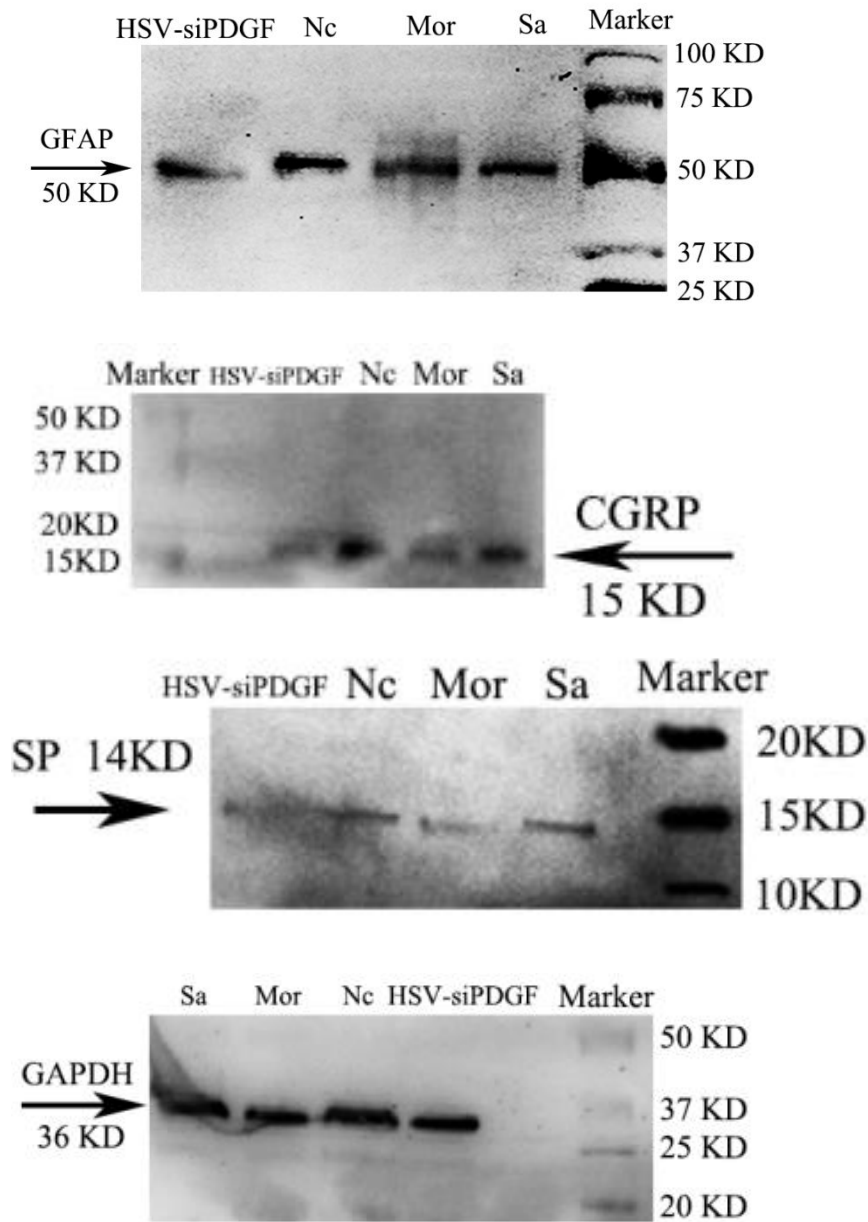

Full-length blots in Figure 4J

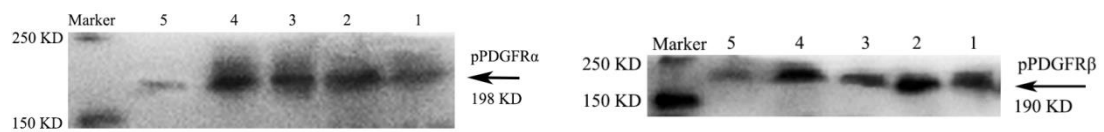

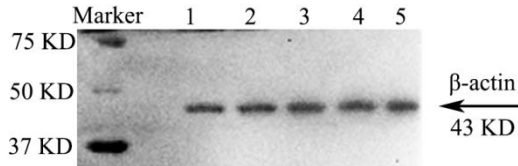

Full-length blots in Figure 5A. Lane 1: Normal; Lane 2: Treatment with saline; Lane 3: Treatment with morphine; Lane 4: Treatment with negative control siRNA; Lane 5: Treatment with PDGF siRNA.

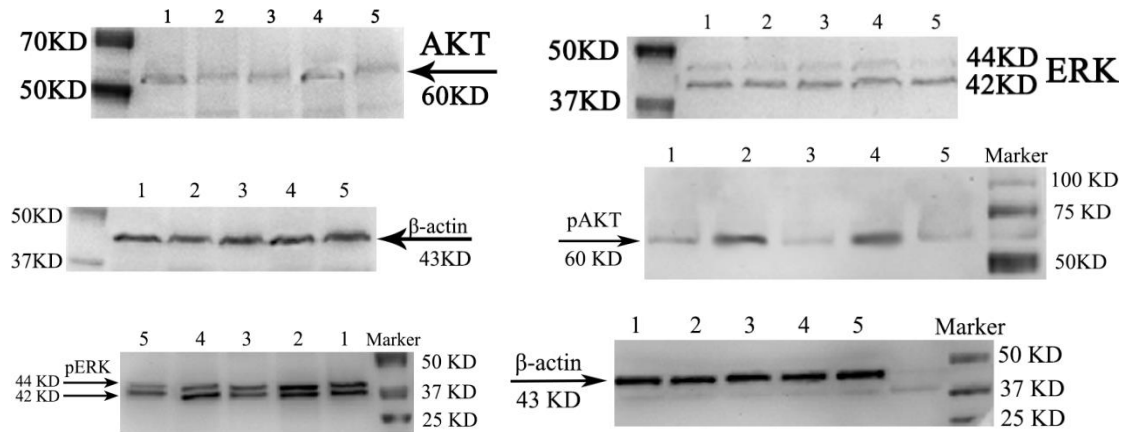

Full-length blots in Figure 5C. Lane 1: Normal; Lane 2: Treatment with saline; Lane 3: Treatment with morphine; Lane 4: Treatment with negative control siRNA; Lane 5: Treatment with PDGF siRNA.

### Data information for paw withdrawal thresholds in Figure 4B

Data are presented as the mean  $\pm$  SEM (0 h after surgery:  $9.4 \pm 0.57$  in the saline group,  $8.1 \pm 0.99$  in the morphine group,  $9.0 \pm 1.53$  in the negative control group,  $9.0 \pm 1.33$  in the HSV-siPDGF group; 1 week after surgery:  $11.2 \pm 1.49$  in the saline group,  $8.7 \pm 1.45$  in the morphine group,  $9.3 \pm 1.72$  in the negative control group,  $8.3 \pm 1.22$  in the HSV-siPDGF group; 2 week after surgery:  $9.5 \pm 3.48$  in the saline group,  $7.2 \pm 2.01$  in the morphine group,  $8.0 \pm 1.55$  in the negative control group,  $8.5 \pm 1.97$  in the HSV-siPDGF group; 3 week after surgery:  $11.0 \pm 2.13$  in the saline group,

6.8±0.86 in the morphine group, 6.2±1.13 in the negative control group, 8.3±1.55 in the HSV-siPDGF group; 4 week after surgery: 6.3±1.53 in the saline group, 6.7±1.81 in the morphine group, 6.4±1.97 in the negative control group, 5.6±1.22 in the HSV-siPDGF group; 1 week after injection: 6.5±0.50 in the saline group, 10.2±0.94 in the morphine group, 8.6±3.63 in the negative control group, 8.3±1.27 in the HSV-siPDGF group; 2 week after injection: 6.6±0.48 in the saline group, 9.5±0.65 in the morphine group, 7.0±0.89 in the negative control group, 9.0±0.78 in the HSV-siPDGF group).

#### **Data information for tail-flick latencies in Figure 4C**

Data are presented as the mean ± SEM (0 h after surgery: 9.0±1.13 in the saline group, 8.0±0.48 in the morphine group, 9.0±1.53 in the negative control group, 9.0±1.11 in the HSV-siPDGF group; 1 week after surgery: 7.2±0.85 in the saline group, 7.3±0.78 in the morphine group, 8.2±1.55 in the negative control group, 7.9±1.21 in the HSV-siPDGF group; 2 week after surgery: 6.7±1.56 in the saline group, 6.3±1.20 in the morphine group, 7.1±0.67 in the negative control group, 7.9±0.62 in the HSV-siPDGF group; 3 week after surgery: 4.7±0.80 in the saline group, 5.9±0.63 in the morphine group, 5.9±0.88 in the negative control group, 5.9±0.94 in the HSV-siPDGF group; 4 week after surgery: 3.3±0.21 in the saline group, 4.0±0.46 in the morphine group, 3.8±0.34 in the negative

control group,  $4.7\pm 3.08$  in the HSV-siPDGF group; 1 week after injection:  $5.2\pm 1.85$  in the saline group,  $9.18\pm 0.94$  in the morphine group,  $4.1\pm 1.02$  in the negative control group,  $10.0\pm 0.53$  in the HSV-siPDGF group; 2 week after injection:  $5.5\pm 1.71$  in the saline group,  $9.6\pm 0.62$  in the morphine group,  $4.3\pm 0.61$  in the negative control group,  $8.5\pm 1.65$  in the HSV-siPDGF group).

### **Supplemental Figure Legends**

**Supplementary Figure 1.** The specificity of the PDGF labeling is confirmed by the results of experimental controls. The immunogen of PDGF-BB antibody (Abcam, ab16829) were synthesized by HangZhou HuaAn Biotechnology Co. Ltd (Wensan road 199, Hangzhou, China. <http://old.huabio.com/en/index.asp>). The amino acid sequence of this peptide is TEVFEISRRLIDRTNA, which are corresponding to amino acids 101-116 of PDGF BB. This peptide had a purity of >95%. The characterization and purity estimation of the peptides were performed by using electrospray mass spectrometry (ESMS) and reverse phase high performance liquid chromatography (RP-HPLC). All peptides were dissolved in sterilized water to 5.6 mg/ml and stored in aliquots at 4 °C. Briefly, the PDGF-BB antibody was pre-incubated with the synthetic peptide (1:5) overnight at 4°C. The ratio was supported by the customer technical support engineer of Abcam in China. Then, the IF experiment

was done as described. The upper panel was stained with rabbit polyclonal anti-PDGF BB showing obvious PDGF immunofluorescence, whereas the images in the lower panel representing the results of the experimental control did not show any immunoreactivity.

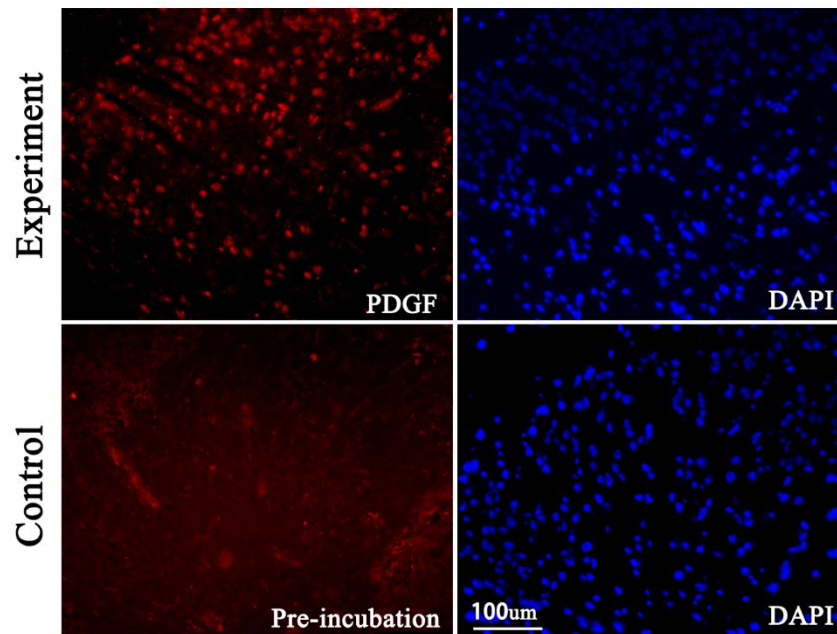

Supplement Fig. S1
